# Supplementary material for: The Dual Burden of Malnutrition Increases the Risk of Cesarean Delivery: Evidence From India
Source: PubMed Central journal article supplement (PMC6199394; doi:10.3389/fpubh.2018.00292), 2018-10-17

**Figure S1. Odds of cesarean delivery associated with short stature, overweight and obesity, or their combination within mothers, stratified by wealth category (5 = wealthiest).**

Results from logistical regression models, unadjusted for any covariates.  
Numbers per group are given in Table S3

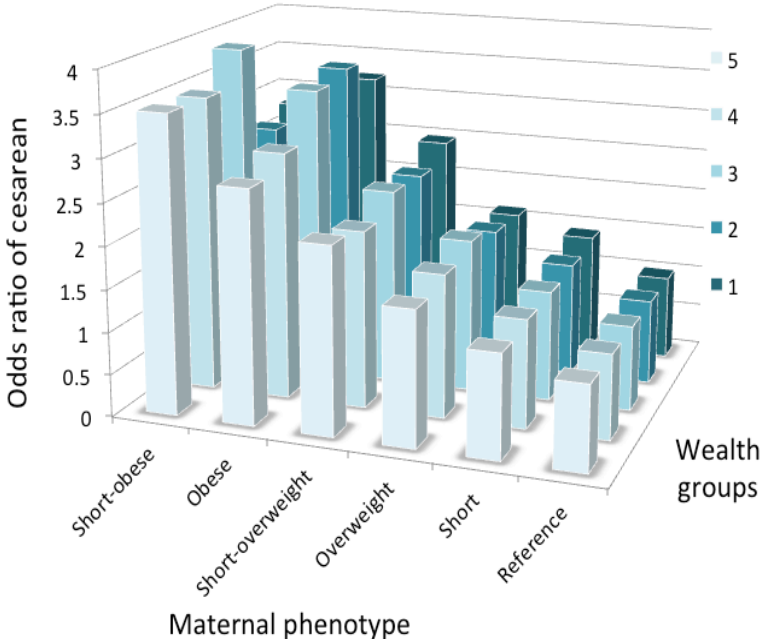

Supplement: Image_1.pdf [file Image_1.pdf]
