# Supplementary material for: The Dual Burden of Malnutrition Increases the Risk of Cesarean Delivery: Evidence From India
Source: PubMed Central journal article supplement (PMC6199394; doi:10.3389/fpubh.2018.00292), 2018-10-17
Supplement: Table_1.pdf [file Table_1.pdf]

**Table S1. Distribution of maternal phenotype and key confounding factors by wealth status in the 2015-2016 survey**

| <b>Wealth category</b>       | <b>1</b> | <b>2</b> | <b>3</b> | <b>4</b> | <b>5</b> | <b>P for Chi-square</b> |
|------------------------------|----------|----------|----------|----------|----------|-------------------------|
| <b>Maternal phenotype</b>    |          |          |          |          |          |                         |
| Short, normal BMI (%)        | 30.6     | 22.9     | 16.2     | 10.5     | 5.5      | <0.0001                 |
| Normal height overweight (%) | 6.0      | 10.7     | 16.0     | 21.3     | 27.2     |                         |
| Normal height obese (%)      | 1.0      | 2.6      | 5.8      | 10.1     | 16.6     |                         |
| Short overweight (%)         | 3.3      | 4.2      | 4.6      | 4.4      | 3.4      |                         |
| Short obese (%)              | 0.5      | 1.0      | 1.8      | 2.5      | 2.7      |                         |
|                              |          |          |          |          |          |                         |
| <b>Location</b>              |          |          |          |          |          |                         |
| Urban                        | 4.5      | 10.4     | 22.5     | 43.1     | 62.6     | <0.0001                 |
|                              |          |          |          |          |          |                         |
| <b>Birth order *</b>         |          |          |          |          |          |                         |
| First-born                   | 16.4     | 20.6     | 21.0     | 20.8     | 21.2     | <0.0001                 |
|                              |          |          |          |          |          |                         |
| <b>Maternal age *</b>        |          |          |          |          |          |                         |
| 15-19 y                      | 3.7      | 4.1      | 3.2      | 2.1      | 1.0      | <0.0001                 |
|                              |          |          |          |          |          |                         |
| <b>Child sex</b>             |          |          |          |          |          |                         |
| Male                         | 53.8     | 54.1     | 54.6     | 53.8     | 55.5     | <0.0001                 |
|                              |          |          |          |          |          |                         |

Selected groups only displayed

N = 175,790 mothers, 232,411 deliveries
