# Supplementary material for: The Dual Burden of Malnutrition Increases the Risk of Cesarean Delivery: Evidence From India
Source: PubMed Central journal article supplement (PMC6199394; doi:10.3389/fpubh.2018.00292), 2018-10-17
Supplement: Table_2.pdf [file Table_2.pdf]

**Table S2. Multivariate logistic regression model for the odds of cesarean delivery in the 2006 survey.**

|                                                  | N=42,184, Nagelkerke $r^2 = 0.258$ |            |         |
|--------------------------------------------------|------------------------------------|------------|---------|
| Predictor                                        | Odds ratio                         | 95% CI     | p       |
| <b>Maternal nutritional status</b>               |                                    |            |         |
| Normal height normal BMI                         | -                                  | -          | -       |
| Overweight                                       | 1.69                               | 1.53, 1.86 | <0.0001 |
| Obese                                            | 2.63                               | 2.33, 2.97 | <0.0001 |
| Short                                            | 1.41                               | 1.28, 1.56 | <0.0001 |
| Short overweight                                 | 2.76                               | 2.36, 3.23 | <0.0001 |
| Short obese                                      | 4.26                               | 3.36, 5.40 | <0.0001 |
| <b>Offspring birth size</b>                      |                                    |            |         |
| Average size or smaller                          | -                                  | -          | -       |
| Larger than average or very large                | 1.21                               | 1.12, 1.30 | <0.0001 |
| <b>Maternal age</b>                              |                                    |            |         |
| 15-19 years                                      | -                                  | -          | -       |
| 20-24 years                                      | 1.32                               | 1.10, 1.59 | 0.003   |
| 25-29 years                                      | 1.97                               | 1.63, 2.37 | <0.0001 |
| 30-34 years                                      | 2.92                               | 2.40, 3.57 | <0.0001 |
| 35-39 years                                      | 4.18                               | 3.32, 5.26 | <0.0001 |
| 40-44 years                                      | 4.59                               | 3.21, 6.55 | <0.0001 |
| 45-49 years                                      | 1.16                               | 0.38, 3.58 | 0.7     |
| <b>Birth number within survey</b>                |                                    |            |         |
| Most recent birth within 5 years                 | -                                  | -          | -       |
| 2 <sup>nd</sup> most recent birth within 5 years | 0.53                               | 0.48, 0.58 | <0.0001 |
| 3 <sup>rd</sup> most recent birth within 5 years | 0.26                               | 0.18, 0.37 | <0.0001 |
| <b>Wealth index</b>                              |                                    |            |         |
| Level 1                                          | -                                  | -          | -       |
| Level 2                                          | 2.04                               | 1.61, 2.58 | <0.0001 |
| Level 3                                          | 3.38                               | 2.71, 4.20 | <0.0001 |
| Level 4                                          | 5.21                               | 4.21, 6.46 | <0.0001 |
| Level 5                                          | 7.38                               | 5.93, 9.17 | <0.0001 |
| <b>Residence</b>                                 |                                    |            |         |
| Rural                                            | -                                  | -          | -       |
| Urban                                            | 1.28                               | 1.19, 1.39 | <0.0001 |
| <b>Birth order</b>                               |                                    |            |         |
| First-born                                       | 22.9                               | 16.1, 32.6 | <0.0001 |
| Second-born                                      | 11.2                               | 7.9, 15.8  | <0.0001 |
| Third-born                                       | 4.98                               | 3.48, 7.12 | <0.0001 |
| Fourth-born                                      | 2.29                               | 1.55, 3.38 | <0.0001 |
| Fifth-born                                       | 1.61                               | 1.02, 2.54 | 0.041   |
| Six+-born                                        | -                                  | -          | -       |
| <b>Offspring sex</b>                             |                                    |            |         |
| Female                                           | -                                  | -          | -       |
| Male                                             | 1.05                               | 0.98, 1.12 | 0.18    |

All coefficients are calculated relative to all other variables in the table, entered into a single logistic regression model
