# Supplementary material for: The Dual Burden of Malnutrition Increases the Risk of Cesarean Delivery: Evidence From India
Source: PubMed Central journal article supplement (PMC6199394; doi:10.3389/fpubh.2018.00292), 2018-10-17
Supplement: Table_3.pdf [file Table_3.pdf]

**Table S3. Numbers included per group in Figure 3 and Figures 5 and 6**

(a) Numbers per group in Figure 3

| Wealth index | Birth order |       |       |      |      |      |
|--------------|-------------|-------|-------|------|------|------|
|              | 1           | 2     | 3     | 4    | 5    | 6    |
| 1            | 16002       | 15970 | 11994 | 7638 | 4360 | 4964 |
| 2            | 18750       | 16461 | 9760  | 5037 | 2526 | 2561 |
| 3            | 18430       | 15277 | 7195  | 3093 | 1323 | 1164 |
| 4            | 17273       | 13406 | 5120  | 1853 | 969  | 498  |
| 5            | 15838       | 11021 | 3302  | 882  | 236  | 132  |

(b) Numbers per group in Figures 5, 6 and S1

| Maternal phenotype       | Wealth index |        |        |        |        |
|--------------------------|--------------|--------|--------|--------|--------|
|                          | 1            | 2      | 3      | 4      | 5      |
| Normal weight and height | 35,654       | 32,384 | 26,125 | 20,159 | 14,104 |
| Short                    | 18,948       | 12,775 | 7,747  | 4,263  | 1,815  |
| Overweight               | 3,483        | 5,761  | 7,239  | 8,056  | 8,471  |
| Short-overweight         | 1,960        | 2,228  | 2,078  | 1,728  | 1,079  |
| Obese                    | 558          | 1,327  | 2,526  | 3,741  | 5,117  |
| Short-obese              | 321          | 528    | 766    | 899    | 824    |
